# Supplementary material
Source: PubMed Central journal article supplement (PMC8921388)
Supplement: 12551_2021_914_MOESM1_ESM.pdf [file 12551_2021_914_MOESM1_ESM.pdf]

## The role of calsequestrin-2 in calcium-mediated arrhythmias

Elliot T. Sibbles<sup>1</sup>, Helen M.M. Waddell<sup>1</sup>, Valeria Mereacre<sup>1</sup>, Peter P. Jones<sup>1</sup> & Michelle L. Munro<sup>1\*</sup>

<sup>1</sup>Department of Physiology & HeartOtago, School of Biomedical Sciences, University of Otago, Dunedin, New Zealand.

\*Corresponding author: Michelle L. Munro

Email: [michelle.munro@otago.ac.nz](mailto:michelle.munro@otago.ac.nz)

### Supplementary Table S1: CSQ2 variants associated with CPVT

| Variant   | Mutation Type | Domain     | Phenotype | References                                |
|-----------|---------------|------------|-----------|-------------------------------------------|
| T4I       | Missense      | N-terminus | CPVT      | (Landstrom et al. 2017)                   |
| S15C      | Missense      | N-terminus | CPVT      | (Landstrom et al. 2017)                   |
| A19E      | Missense      | N-terminus | CPVT      | (Landstrom et al. 2017)                   |
| E21+14X   | Deletion      |            | CPVT      | (Hayashi et al. 2009)                     |
| L37I      | Missense      | I          | CPVT      | (Landstrom et al. 2017)                   |
| E39K      | Missense      | I          | CPVT      | (Ng et al. 2020)                          |
| E39X      | Non-sense     | I          | CPVT      | (Ng et al. 2020)                          |
| D50N      | Missense      | I          | CPVT      | (Landstrom et al. 2017)                   |
| C53F      | Missense      | I          | CPVT      | (Ng et al. 2020)                          |
| H57R      | Missense      | I          | CPVT      | (Landstrom et al. 2017)                   |
| E58V      | Missense      | I          | CPVT      | (Landstrom et al. 2017)                   |
| T66A      | SNP           | I          | CPVT, SD  | (Laitinen et al. 2003, Wong et al. 2009)  |
| Q67X      | Non-sense     | I          | CPVT      | (Josephs et al. 2017)                     |
| K68Nfs*5  | Frameshift    |            | PVCs      | (Ng et al. 2020)                          |
| Q69E      | Missense      | I          | CPVT      | (Landstrom et al. 2017)                   |
| Q71Hfs*2  | Frameshift    |            | CPVT      | (Ng et al. 2020)                          |
| V76M      | SNP           | I          | SD        | (Laitinen et al. 2003, Wong et al. 2009)  |
| L77P      | Missense      | I          | CPVT      | (Al-Hassnan et al. 2013)                  |
| 234+2T>C  | Splicing      |            | CPVT      | (Ng et al. 2020)                          |
| Q82H      | Missense      | I          | CPVT      | (Landstrom et al. 2017)                   |
| K87X      | Non-sense     | I          | CPVT      | (Kawamura et al. 2013)                    |
| I89V      | Missense      | I          | CPVT      | (Landstrom et al. 2017)                   |
| A96G      | Missense      | I          | CPVT      | (Landstrom et al. 2017)                   |
| 320-2A>G  | Splicing      |            | CPVT      | (Roux-Buisson et al. 2011)                |
| S113N     | Missense      | I          | CPVT      | (Landstrom et al. 2017)                   |
| S113Rfs*6 | Frameshift    |            | CPVT      | (di Barletta et al. 2006, Ng et al. 2020) |
| R121C     | Missense      | I          | CPVT      | (Landstrom et al. 2017)                   |
| G127G     | Splicing      |            | CPVT      | (Roux-Buisson et al. 2011)                |
| V135M     | Missense      | I          | CPVT      | (Landstrom et al. 2017)                   |
| F137L     | Missense      | I          | CPVT      | (Landstrom et al. 2017)                   |
| L138P     | Missense      | I          | CPVT      | (Landstrom et al. 2017)                   |
| 421-2A>T  | Splicing      |            | CPVT      | (Ng et al. 2020)                          |
| E159K     | Missense      | II         | CPVT      | (Landstrom et al. 2017)                   |
| R160H     | Missense      | II         | CPVT      | (Landstrom et al. 2017)                   |
| I161V     | Missense      | II         | CPVT      | (Landstrom et al. 2017)                   |
| I161L     | Missense      | II         | CPVT      | (Landstrom et al. 2017)                   |
| I161T     | Missense      | II         | CPVT      | (Landstrom et al. 2017)                   |
| Y164C     | Missense      | II         | CPVT      | (Landstrom et al. 2017)                   |
| S173I     | Missense      | II         | CPVT, SD  | (Ng et al. 2020, Titus et al. 2020)       |

## Biophysical Reviews

|            |            |            |         |                                                                 |
|------------|------------|------------|---------|-----------------------------------------------------------------|
| E177Q      | Missense   | II         | SD      | (Wong et al. 2009)                                              |
| F182S      | Missense   | II         | CPVT    | (Ng et al. 2020)                                                |
| F182Lfs*28 | Frameshift |            | CPVT    | (Hayashi et al. 2009, Roux-Buisson et al. 2011)                 |
| P191L      | Missense   | II         | CPVT    | (Nouira et al. 2019)                                            |
| V203Lfs*7  | Frameshift | II         | CPVT    | (Ng et al. 2020)                                                |
| P231S      | Missense   | II         | CPVT    | (Ng et al. 2020)                                                |
| H244Y      | Missense   | II         | CPVT    | (Landstrom et al. 2017)                                         |
| Q245X      | Non-sense  | II         | CPVT    | (Ng et al. 2020)                                                |
| 737+1G>A   | Splicing   |            | CPVT    | (Roux-Buisson et al. 2011)                                      |
| 737+2T>A   | Splicing   |            | CPVT    | (Ng et al. 2020)                                                |
| 738-3C>A   | Splicing   |            | CPVT    | (Ng et al. 2020)                                                |
| 738-2A>G   | Splicing   |            | CPVT    | (Proost et al. 2017)                                            |
| R250C      | Missense   | III        | CPVT    | (Landstrom et al. 2017, Gao et al. 2018, Li et al. 2019)        |
| R250G      | Missense   | III        | CPVT    | (Landstrom et al. 2017)                                         |
| R251H      | Missense   | III        | CA      | (Landstrom et al. 2017, Ng et al. 2020)                         |
| R253H      | Missense   | III        | CPVT    | (Landstrom et al. 2017)                                         |
| W261X      | Non-sense  | III        | CPVT    | (Ng et al. 2020)                                                |
| I270T      | Missense   | III        | CA      | (Ng et al. 2020)                                                |
| 838+1G>A   | Splicing   |            | CPVT    | (Li et al. 2019)                                                |
| 383+3A>G   | Splicing   |            | CPVT    | (Ng et al. 2020)                                                |
| L288V      | Missense   | III        | CPVT    | (Landstrom et al. 2017)                                         |
| P308L      | Missense   | III        | CPVT    | (Hong et al. 2012, Ng et al. 2020)                              |
| P308Q      | Missense   | III        | Syncope | (Ng et al. 2020)                                                |
| D310N      | Missense   | III        | CPVT    | (Landstrom et al. 2017, Ng et al. 2020)                         |
| 939+5G>C   | Splicing   |            | CPVT    | (Roux-Buisson et al. 2011)                                      |
| V315I      | Missense   | III        | CPVT    | (Landstrom et al. 2017)                                         |
| D325E      | Missense   | III        | CPVT    | (Ng et al. 2020)                                                |
| P329S      | Missense   | III        | CPVT    | (Landstrom et al. 2017, Wang et al. 2020)                       |
| Q330X      | Non-sense  |            | CPVT    | (Hong et al. 2012)                                              |
| G332R      | Missense   | III        | CPVT    | (Landstrom et al. 2017, Wang et al. 2020)                       |
| 1014+1G>A  | Splicing   |            | CPVT    | (Landstrom et al. 2017, Ng et al. 2020)                         |
| 1014+3G>A  | Splicing   |            | CPVT    | (Landstrom et al. 2017)                                         |
| A339Vfs*2  | Frameshift |            | CPVT    | (Ng et al. 2020)                                                |
| D340X      | Non-sense  |            | CPVT    | (Ng et al. 2020)                                                |
| D351G      | Missense   | III        | SIDS    | (Landstrom et al. 2017, Neubauer et al. 2017, Wang et al. 2020) |
| E359Rfs*12 | Frameshift |            | CPVT    | (Ng et al. 2020)                                                |
| G359Afs*12 | Frameshift |            | CPVT    | (Li et al. 2019)                                                |
| W361R      | Missense   | III        | CA      | (Ng et al. 2020)                                                |
| L366P      | Missense   | III        | SD      | (Ng et al. 2020)                                                |
| E377D      | Missense   | C-terminus | CPVT    | (Landstrom et al. 2017)                                         |
| D379V      | Missense   | C-terminus | CPVT    | (Landstrom et al. 2017)                                         |
| 383_383del | Deletion   |            | CPVT    | (Landstrom et al. 2017)                                         |
| N384H      | Missense   | C-terminus | CPVT    | (Landstrom et al. 2017)                                         |
| D392Vfs*84 | Frameshift |            | CPVT    | (Li et al. 2019)                                                |
| D395D      | SNP        | C-terminus | SD      | (Wong et al. 2009)                                              |
| 395_396del | Deletion   |            | CPVT    | (Landstrom et al. 2017)                                         |
| D396N      | Missense   | C-terminus | CPVT    | (Landstrom et al. 2017)                                         |
| E399A      | Missense   | C-terminus | CPVT    | (Landstrom et al. 2017)                                         |

CA: cardiac arrest; CPVT: catecholaminergic polymorphic ventricular tachycardiac; CSQ2: calsequestrin-2; PVCs: premature ventricular contractions; SD: sudden death; SIDS: sudden infant death syndrome; SNP: single-nucleotide polymorphism

## Supplementary References

- Al-Hassnan, Z. N., S. Tulbah, W. Al-Manea and M. Al-Fayyadh (2013). The phenotype of a CASQ2 mutation in a Saudi family with catecholaminergic polymorphic ventricular tachycardia. *Pacing Clin Electrophysiol* 36(5): e140-142.
- di Barletta, M. R., S. Viatchenko-Karpinski, A. Nori, M. Memmi, D. Terentyev, F. Turcato, G. Valle, N. Rizzi, C. Napolitano, S. Gyorke, P. Volpe and S. G. Priori (2006). Clinical phenotype and functional characterization of CASQ2 mutations associated with catecholaminergic polymorphic ventricular tachycardia. *Circulation* 114(10): 1012-1019.
- Gao, L., L. Cui, L. Zheng, Z. Zhao, Q. Li, X. Yu, J. Wang and Y. Yuan (2018). A novel variant of the CASQ2 gene in a Chinese family with catecholaminergic polymorphic ventricular tachycardia. *Cardiol J* 25(6): 756-758.
- Hayashi, M., I. Denjoy, F. Extramiana, A. Maltret, N. R. Buisson, J. M. Lupoglazoff, D. Klug, M. Hayashi, S. Takatsuki, E. Villain, J. Kamblock, A. Messali, P. Guicheney, J. Lunardi and A. Leenhardt (2009). Incidence and risk factors of arrhythmic events in catecholaminergic polymorphic ventricular tachycardia. *Circulation* 119(18): 2426-2434.
- Hong, R. A., K. K. Rivera, A. Jittirat and J. J. Choi (2012). Flecainide suppresses defibrillator-induced storming in catecholaminergic polymorphic ventricular tachycardia. *Pacing Clin Electrophysiol* 35(7): 794-797.
- Josephs, K., K. Patel, C. M. Janson, C. Montagna and T. V. McDonald (2017). Compound heterozygous CASQ2 mutations and long-term course of catecholaminergic polymorphic ventricular tachycardia. *Mol Genet Genomic Med* 5(6): 788-794.
- Kawamura, M., S. Ohno, N. Naiki, I. Nagaoka, K. Dochi, Q. Wang, K. Hasegawa, H. Kimura, A. Miyamoto, Y. Mizusawa, H. Itoh, T. Makiyama, N. Sumitomo, H. Ushinohama, K. Oyama, N. Murakoshi, K. Aonuma, H. Horigome, T. Honda, M. Yoshinaga, M. Ito and M. Horie (2013). Genetic background of catecholaminergic polymorphic ventricular tachycardia in Japan. *Circ J* 77(7): 1705-1713.
- Laitinen, P. J., H. Swan and K. Kontula (2003). Molecular genetics of exercise-induced polymorphic ventricular tachycardia: identification of three novel cardiac ryanodine receptor mutations and two common calsequestrin 2 amino-acid polymorphisms. *European Journal of Human Genetics* 11(11): 888-891.
- Landstrom, A. P., A. L. Dailey-Schwartz, J. A. Rosenfeld, Y. Yang, M. J. McLean, C. Y. Miyake, S. O. Valdes, Y. Fan, H. D. Allen, D. J. Penny and J. J. Kim (2017). Interpreting Incidentally Identified Variants in Genes Associated With Catecholaminergic Polymorphic Ventricular Tachycardia in a Large Cohort of Clinical Whole-Exome Genetic Test Referrals. *Circulation: Arrhythmia and Electrophysiology* 10(4): e004742.
- Li, Q., R. Guo, L. Gao, L. Cui, Z. Zhao, X. Yu, Y. Yuan and X. Xu (2019). CASQ2 variants in Chinese children with catecholaminergic polymorphic ventricular tachycardia. *Molecular genetics & genomic medicine* 7(11): e949-e949.
- Neubauer, J., M. R. Lecca, G. Russo, C. Bartsch, A. Medeiros-Domingo, W. Berger and C. Haas (2017). Post-mortem whole-exome analysis in a large sudden infant death syndrome cohort with a focus on cardiovascular and metabolic genetic diseases. *European Journal of Human Genetics* 25(4): 404-409.
- Ng, K., E. W. Titus, K. V. Lieve, T. M. Roston, A. Mazzanti, F. H. Deiter, I. Denjoy, J. Ingles, J. Till, T. Robyns, S. P. Connors, C. Steinberg, D. J. Abrams, B. Pang, M. M. Scheinman, J. M. Bos, S. A. Duffett, C. van der Werf, A. Maltret, M. S. Green, J. Rutberg, S. Balaji, J. Cadrin-Tourigny, K. M. Orland, L. M. Knight, C. Brateng, J. Wu, A. S. Tang, A. C. Skanes, J. Manlucu, J. S. Healey, C. T. January, A. D. Krahn, K. K. Collins, K. R. Maginot, P. Fischbach, S. P. Etheridge, L. L. Eckhardt, R. M. Hamilton, M. J. Ackerman, F. R. I. Noguera, C. Semsarian, N. Jura, A. Leenhardt, M. H. Gollob, S. G. Priori, S. Sanatani, A. A. M. Wilde, R. C. Deo and J. D. Roberts (2020). An International Multicenter Evaluation of Inheritance Patterns, Arrhythmic Risks, and

- Underlying Mechanisms of CASQ2-Catecholaminergic Polymorphic Ventricular Tachycardia. *Circulation* 142(10): 932-947.
- Nouira, S., S. Chabrak and H. Ouragini (2019). Clinical and genetic investigation of catecholaminergic polymorphic ventricular tachycardia in a consanguineous Tunisian family. *Acta Cardiol*: 1-4.
- Proost, D., J. Saenen, G. Vandeweyer, A. Rotthier, M. Alaerts, E. M. Van Craenenbroeck, J. Van Crombruggen, G. Mortier, W. Wuyts, C. Vrints, J. Del Favero, B. Loeys and L. Van Laer (2017). Targeted Next-Generation Sequencing of 51 Genes Involved in Primary Electrical Disease. *J Mol Diagn* 19(3): 445-459.
- Roux-Buisson, N., J. Rendu, I. Denjoy, P. Guicheney, A. Goldenberg, N. David, L. Faivre, O. Barthez, G. A. Danieli, I. Marty, J. Lunardi and J. Fauré (2011). Functional analysis reveals splicing mutations of the CASQ2 gene in patients with CPVT: implication for genetic counselling and clinical management. *Hum Mutat* 32(9): 995-999.
- Titus, E. W., F. H. Deiter, C. Shi, J. Wojciak, M. Scheinman, N. Jura and R. C. Deo (2020). The structure of a calsequestrin filament reveals mechanisms of familial arrhythmia. *Nat Struct Mol Biol* 27(12): 1142-1151.
- Wang, Q., T. Paskevicius, A. Filbert, W. Qin, H. J. Kim, X.-Z. Chen, J. Tang, J. B. Dacks, L. B. Agellon and M. Michalak (2020). Phylogenetic and biochemical analysis of calsequestrin structure and association of its variants with cardiac disorders. *Scientific reports* 10(1): 18115-18115.
- Wong, C. H., S. H. Koo, G. Q. She, P. Chui and E. J. Lee (2009). Genetic variability of RyR2 and CASQ2 genes in an Asian population. *Forensic Sci Int* 192(1-3): 53-55.
